# Supplementary material for: Sensitive and Reversible Ammonia Gas Sensor Based on Single-Walled Carbon Nanotubes
Source: MDPI journal article supplement (doi:10.3390/chemosensors11040247), 2023-04-16
Supplement: s1 [file s1]

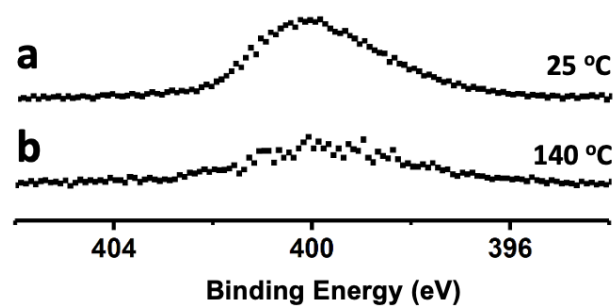

**Figure S1.** XPS transition of N1s from SWCNTs exposed to 1 ppm ammonia at 25 °C (a) and 140 °C (b), followed by N<sub>2</sub> purging.

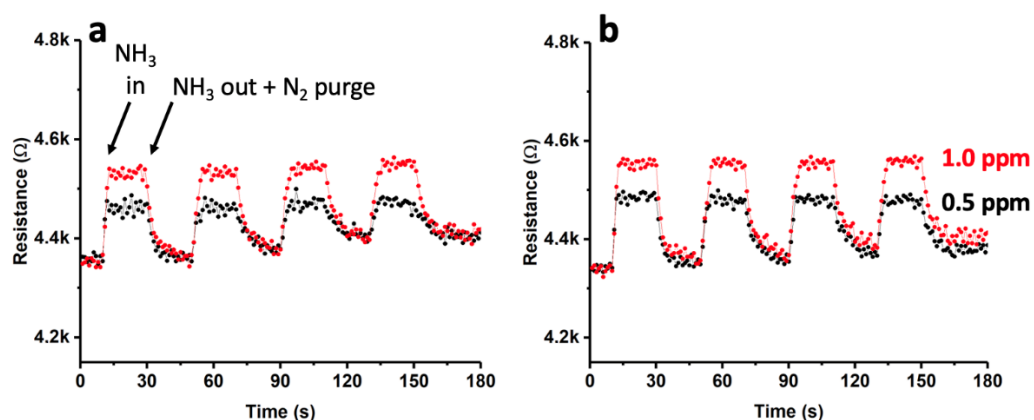

**Figure S2.** Dynamic response curve for SWCNTs towards NH<sub>3</sub> (0.5 ppm and 1 ppm), at 25 °C (a) and 140 °C (b).

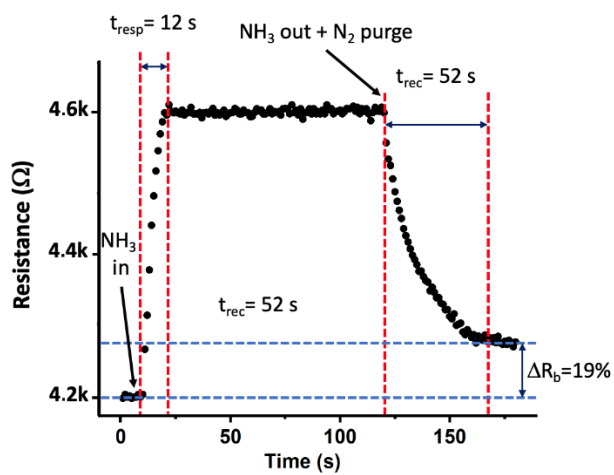

**Figure S3.** The response time and recovery time of the sensor based on Au-SWCNTs to an exposure of 1 ppm ammonia concentration at 25 °C.
